# Supplementary material
Source: publisher figshare collection journal article supplement (https://asha.figshare.com/articles/dataset/_/17700980)
Supplement: Supplementary file 1 [file 1]

**Supplemental Material S3.** Correlations among LSA variables in kindergarten and observed language variables in Grade 2.

|                           | 1 | 2   | 3     | 4    | 5     | 6     | 7     | 8     | 9     | 10    |
|---------------------------|---|-----|-------|------|-------|-------|-------|-------|-------|-------|
| 1. NLS-TotUtt             | — | .10 | .87** | -.11 | .10   | .13*  | .07   | .08   | .09   | .14*  |
| 2. NLS-MLU                |   | —   | .46** | .05  | .23** | .21** | .29** | .33** | .33** | .19** |
| 3. NLS-NDW                |   |     | —     | -.06 | .22** | .23** | .23** | .27** | .27** | .22** |
| 4. NLS-PGU                |   |     |       | —    | .12   | .25** | .30** | .25** | .33** | .16*  |
| 5. CELF-WS                |   |     |       |      | —     | .44** | .50** | .50** | .49** | .37** |
| 6. TROG                   |   |     |       |      |       | —     | .53** | .63** | .63** | .46** |
| 7. MDT                    |   |     |       |      |       |       | —     | .65** | .64** | .45** |
| 8. PPVT                   |   |     |       |      |       |       |       | —     | .76** | .44** |
| 9. EVT                    |   |     |       |      |       |       |       |       | —     | .49** |
| 10. CELF-WC               |   |     |       |      |       |       |       |       |       | —     |
| <i>Mean</i>               |   |     |       |      | 27.1  | 15.7  | 14.2  | 140.7 | 107.4 | 36.3  |
| <i>Standard Deviation</i> |   |     |       |      | 3.0   | 2.8   | 4.8   | 15.0  | 12.7  | 3.0   |

*Note.* Correlations are based on raw scores. NLS = Narrative Language Sample; TotUtt = Total Number of Utterances; MLU = Mean Length of Utterance; NDW = Number of Different Words; PGU = Percent Grammatical Utterances; CELF-WS = Clinical Evaluation of Language Fundamentals–4<sup>th</sup> Edition, Word Structure subtest; TROG = The Test for Reception of Grammar–Version 2; MDT = Morphological Derivation Task; PPVT = Peabody Picture Vocabulary Test–4<sup>th</sup> Edition; EVT = Expressive Vocabulary Test–2<sup>nd</sup> Edition; CELF-WC = Clinical Evaluation of Language Fundamentals–4<sup>th</sup> Edition, Word Classes subtest.

\* $p < .05$ . \*\* $p < .01$ .
