# Supplementary material
Source: publisher figshare collection journal article supplement (https://asha.figshare.com/articles/dataset/_/17700980)
Supplement: Supplementary file 2 [file 1]

**Supplemental Material S1.** Correlations among LSA variables in kindergarten and observed language variables in kindergarten.

|                           | 1 | 2   | 3     | 4    | 5     | 6     | 7     | 8     | 9     | 10    | 11    | 12    | 13    |
|---------------------------|---|-----|-------|------|-------|-------|-------|-------|-------|-------|-------|-------|-------|
| 1. NLS-TotUtt             | — | .10 | .87** | -.11 | .12*  | .10   | .13*  | .08   | .15*  | .20** | .02   | .02   | .15*  |
| 2. NLS-MLU                |   | —   | .46** | .05  | .20** | .25** | .22** | .31** | .35** | .29** | .25** | .23** | .29** |
| 3. NLS-NDW                |   |     | —     | -.06 | .23** | .26** | .29** | .26** | .35** | .32** | .14*  | .13*  | .28** |
| 4. NLS-PGU                |   |     |       | —    | .36** | .21** | .22** | .27** | .33** | .13*  | .32** | .33** | .19** |
| 5. CELF-WS                |   |     |       |      | —     | .5**  | .54** | .47** | .58** | .45** | .43** | .39** | .37** |
| 6. TROG                   |   |     |       |      |       | —     | .46** | .55** | .61** | .53** | .39** | .34** | .39** |
| 7. MDT                    |   |     |       |      |       |       | —     | .48** | .56** | .32** | .26** | .30** | .41** |
| 8. PPVT                   |   |     |       |      |       |       |       | —     | .71** | .55** | .38** | .36** | .49** |
| 9. EVT                    |   |     |       |      |       |       |       |       | —     | .56** | .39** | .40** | .50** |
| 10. CELF-WC               |   |     |       |      |       |       |       |       |       | —     | .43** | .32** | .45** |
| 11. TEGS                  |   |     |       |      |       |       |       |       |       |       | —     | .43** | .25** |
| 12. TEGT                  |   |     |       |      |       |       |       |       |       |       |       | —     | .30** |
| 13. MLJ                   |   |     |       |      |       |       |       |       |       |       |       |       | —     |
| <i>Mean</i>               |   |     |       |      | 20.9  | 11.3  | 5.3   | 114.9 | 86.3  | 30.7  | 8.1   | 10.6  | 13.2  |
| <i>Standard Deviation</i> |   |     |       |      | 4.4   | 3.6   | 3.0   | 15.9  | 12.3  | 6.5   | 2.5   | 4.3   | 3.4   |

*Note.* Correlations are based on raw scores. NLS = Narrative Language Sample; TotUtt = Total Number of Utterances; MLU = Mean Length of Utterance; NDW = Number of Different Words; PGU = Percent Grammatical Utterances; CELF-WS = Clinical Evaluation of Language Fundamentals–4<sup>th</sup> Edition, Word Structure subtest; TROG = The Test for Reception of Grammar–Version 2; MDT = Morphological Derivation Task; PPVT = Peabody Picture Vocabulary Test–4<sup>th</sup> Edition; EVT = Expressive Vocabulary Test–2<sup>nd</sup> Edition; CELF-WC = Clinical Evaluation of Language Fundamentals–4<sup>th</sup> Edition, Word Classes subtest; TEGS = Test of Early Grammatical Impairment, Third Person Singular probe; TEGT = Test of Early Grammatical Impairment, Past Tense probe; MLJ = Morphological Lexical Judgment.

\* $p < .05$ . \*\* $p < .01$ .
