# Supplementary material
Source: publisher figshare collection journal article supplement (https://asha.figshare.com/articles/dataset/_/17700980)
Supplement: Supplementary file 4 [file 1]

**Supplemental Material S4.** Correlations among LSA variables in kindergarten and observed language variables in Grade 3.

|                           | 1 | 2   | 3     | 4    | 5     | 6     | 7     | 8     | 9     | 10    |
|---------------------------|---|-----|-------|------|-------|-------|-------|-------|-------|-------|
| 1. NLS-TotUtt             | — | .10 | .87** | -.11 | .12   | .05   | .14*  | .06   | .09   | .14*  |
| 2. NLS-MLU                |   | —   | .46** | .05  | .29** | .18** | .23** | .19** | .30** | .22** |
| 3. NLS-NDW                |   |     | —     | -.06 | .26** | .16*  | .25** | .19** | .26** | .25** |
| 4. NLS-PGU                |   |     |       | —    | .18** | .27** | .27** | .22** | .32** | .18** |
| 5. CELF-WS                |   |     |       |      | —     | .39** | .46** | .37** | .41** | .42** |
| 6. TROG                   |   |     |       |      |       | —     | .56** | .63** | .61** | .50** |
| 7. MDT                    |   |     |       |      |       |       | —     | .63** | .66** | .58** |
| 8. PPVT                   |   |     |       |      |       |       |       | —     | .72** | .64** |
| 9. EVT                    |   |     |       |      |       |       |       |       | —     | .67** |
| 10. CELF-WC               |   |     |       |      |       |       |       |       |       | —     |
| <i>Mean</i>               |   |     |       |      | 28.5  | 16.9  | 17.8  | 152.4 | 116.5 | 18.3  |
| <i>Standard Deviation</i> |   |     |       |      | 2.4   | 2.3   | 4.7   | 15.1  | 14.0  | 5.1   |

*Note.* Correlations are based on raw scores. NLS = Narrative Language Sample; TotUtt = Total Number of Utterances; MLU = Mean Length of Utterance; NDW = Number of Different Words; PGU = Percent Grammatical Utterances; CELF-WS = Clinical Evaluation of Language Fundamentals–4<sup>th</sup> Edition, Word Structure subtest; TROG = The Test for Reception of Grammar–Version 2; MDT = Morphological Derivation Task; PPVT = Peabody Picture Vocabulary Test–4<sup>th</sup> Edition; EVT = Expressive Vocabulary Test–2<sup>nd</sup> Edition; CELF-WC = Clinical Evaluation of Language Fundamentals–4<sup>th</sup> Edition, Word Classes subtest.

\* $p < .05$ . \*\* $p < .01$ .
